# Supplementary material for: Transcriptional landscapes of de novo root regeneration from detached Arabidopsis leaves revealed by time-lapse and single-cell RNA sequencing analyses
Source: PubMed Central journal article supplement — Plant Commun. 2022 Feb 25;3(4):100306. doi: 10.1016/j.xplc.2022.100306 (PMC9284295; doi:10.1016/j.xplc.2022.100306), 2022-02-25
Supplement: mmc1.pdf [file mmc1.pdf]

**Plant Communications, Volume 3**

**Supplemental information**

**Transcriptional landscapes of *de novo* root regeneration from detached *Arabidopsis* leaves revealed by time-lapse and single-cell RNA sequencing analyses**

**Wu Liu, Yuyun Zhang, Xing Fang, Sorrel Tran, Ning Zhai, Zhengfei Yang, Fu Guo, Lyuqin Chen, Jie Yu, Madalene S. Ison, Teng Zhang, Lijun Sun, Hongwu Bian, Yijing Zhang, Li Yang, and Lin Xu**

*Supplemental Information*

**Transcriptional landscapes of *de novo* root regeneration from detached *Arabidopsis* leaves revealed by time-lapse and single-cell RNA sequencing analyses**

Wu Liu<sup>1,\*</sup>, Yuyun Zhang<sup>1,2,\*</sup>, Xing Fang<sup>1,2,\*</sup>, Sorrel Tran<sup>3,\*</sup>, Ning Zhai<sup>1,2,\*</sup>, Zhengfei Yang<sup>1,4</sup>, Fu Guo<sup>5</sup>, Lyuqin Chen<sup>1,2,6</sup>, Jie Yu<sup>1</sup>, Madalene S. Ison<sup>3</sup>, Teng Zhang<sup>1,2</sup>, Lijun Sun<sup>7</sup>, Hongwu Bian<sup>8</sup>, Yijing Zhang<sup>1,9,#</sup>, Li Yang<sup>3,#</sup>, Lin Xu<sup>1,#</sup>

1, National Key Laboratory of Plant Molecular Genetics, CAS Center for Excellence in Molecular Plant Sciences, Institute of Plant Physiology and Ecology, Chinese Academy of Sciences, 300 Fenglin Road, Shanghai 200032, China.

2, University of Chinese Academy of Sciences, 19A Yuquan Road, Beijing, 100049, China.

3, Department of Plant Pathology, University of Georgia, Athens, GA, USA.

4, College of Life Sciences, Shanghai Normal University, Shanghai 200234, China

5, Hainan Institute of Zhejiang University, Yazhou Bay Science and Technology City, Sanya 572025, China

6, Present address: Department of Pharmacology and Chemical Biology, UPMC Hillman Cancer Center, Magee-Womens Research Institute, University of Pittsburgh, Pittsburgh, PA, USA.

7, School of Life Sciences, Nantong University, Nantong, China.

8, Institute of Genetic and Regenerative Biology, Key Laboratory for Cell and Gene Engineering of Zhejiang Province, College of Life Sciences, Zhejiang University, Hangzhou 310058, China

9, State Key Laboratory of Genetic Engineering, Collaborative Innovation Center of Genetics and Development, Department of Biochemistry, Institute of Plant Biology, School of Life Sciences, Fudan University, Shanghai 200438, China

\*, These authors contributed equally to this work.

#, Authors for correspondence (Yijing Zhang, Li Yang, Lin Xu)

Yijing Zhang

E-mail: zhangyijing@fudan.edu.cn

Li Yang

E-mail: li.yang1@uga.edu

Lin Xu

E-mail: xulin@cemps.ac.cn

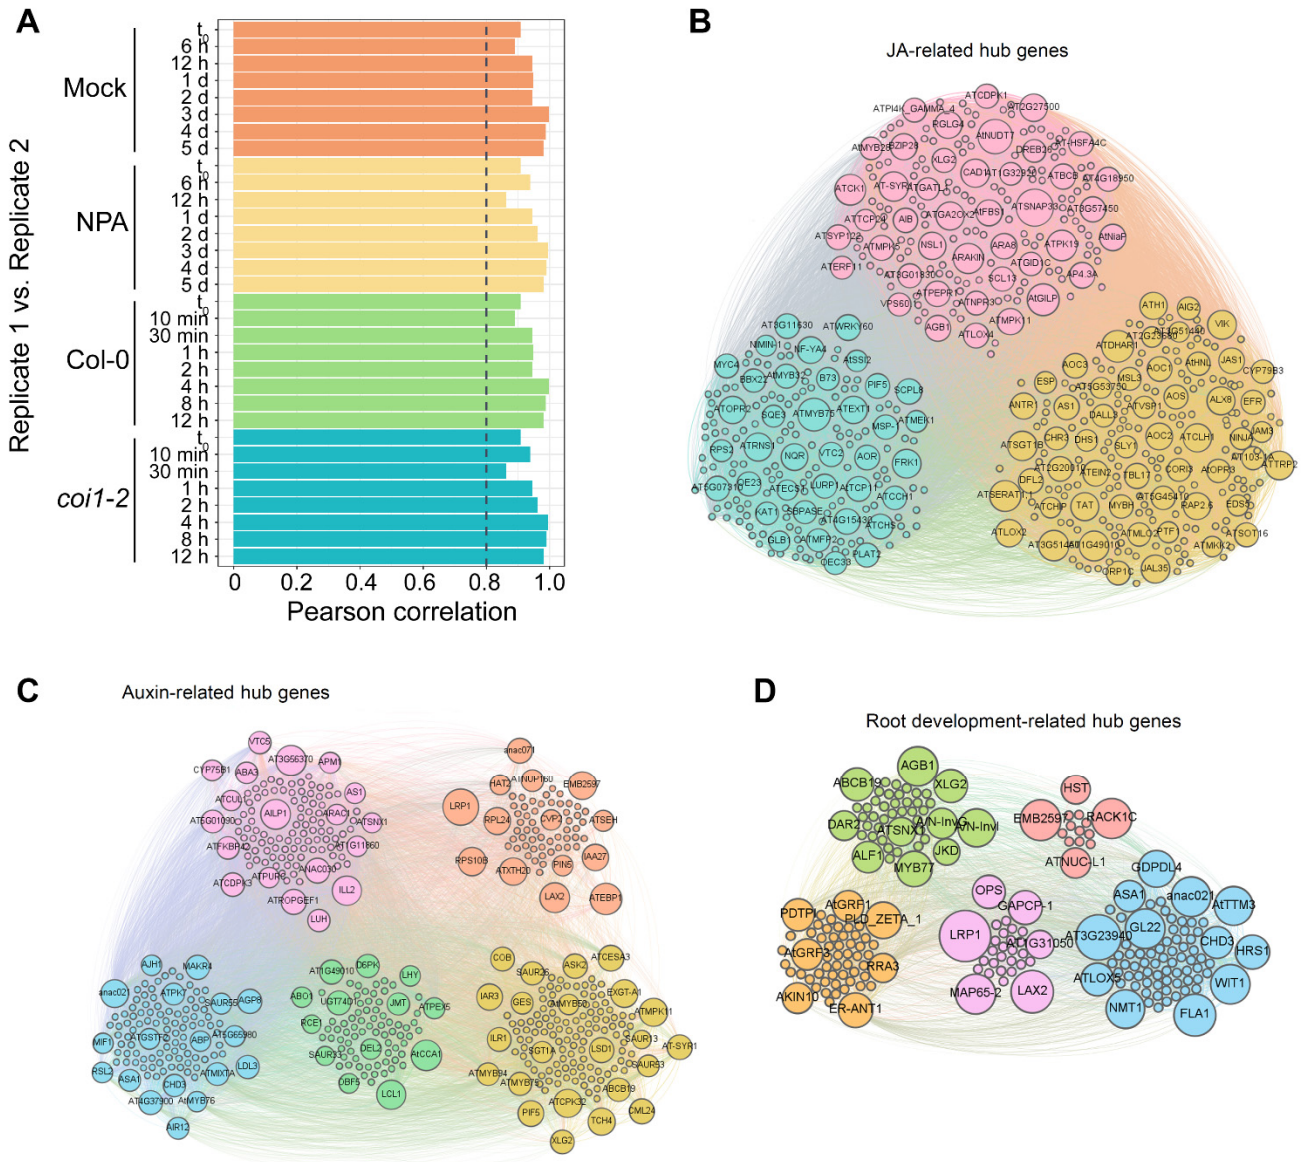

**Supplemental Figure 1. Quality control of RNA-seq data and examples of co-expression sub-networks.**

(A) Correlation between biological replicates in time-lapse RNA-seq analysis indicated by Pearson correlation coefficients between gene expression values (TPM) in two replicates.

(B–D) Examples of JA-related (B), auxin-related (C) and root development-related (D) hub genes in the co-expression sub-network. Size of dots represents the membership of genes. Color of dots represents the class of genes. The JA-related co-expression sub-network was built using the time-lapse RNA-seq data of *Col-0* and *coi1-2*, and the auxin- and root development-related co-expression sub-networks were built using the time-lapse RNA-seq data of mock and NPA treatment. See Table S1 for the full list of hub genes.

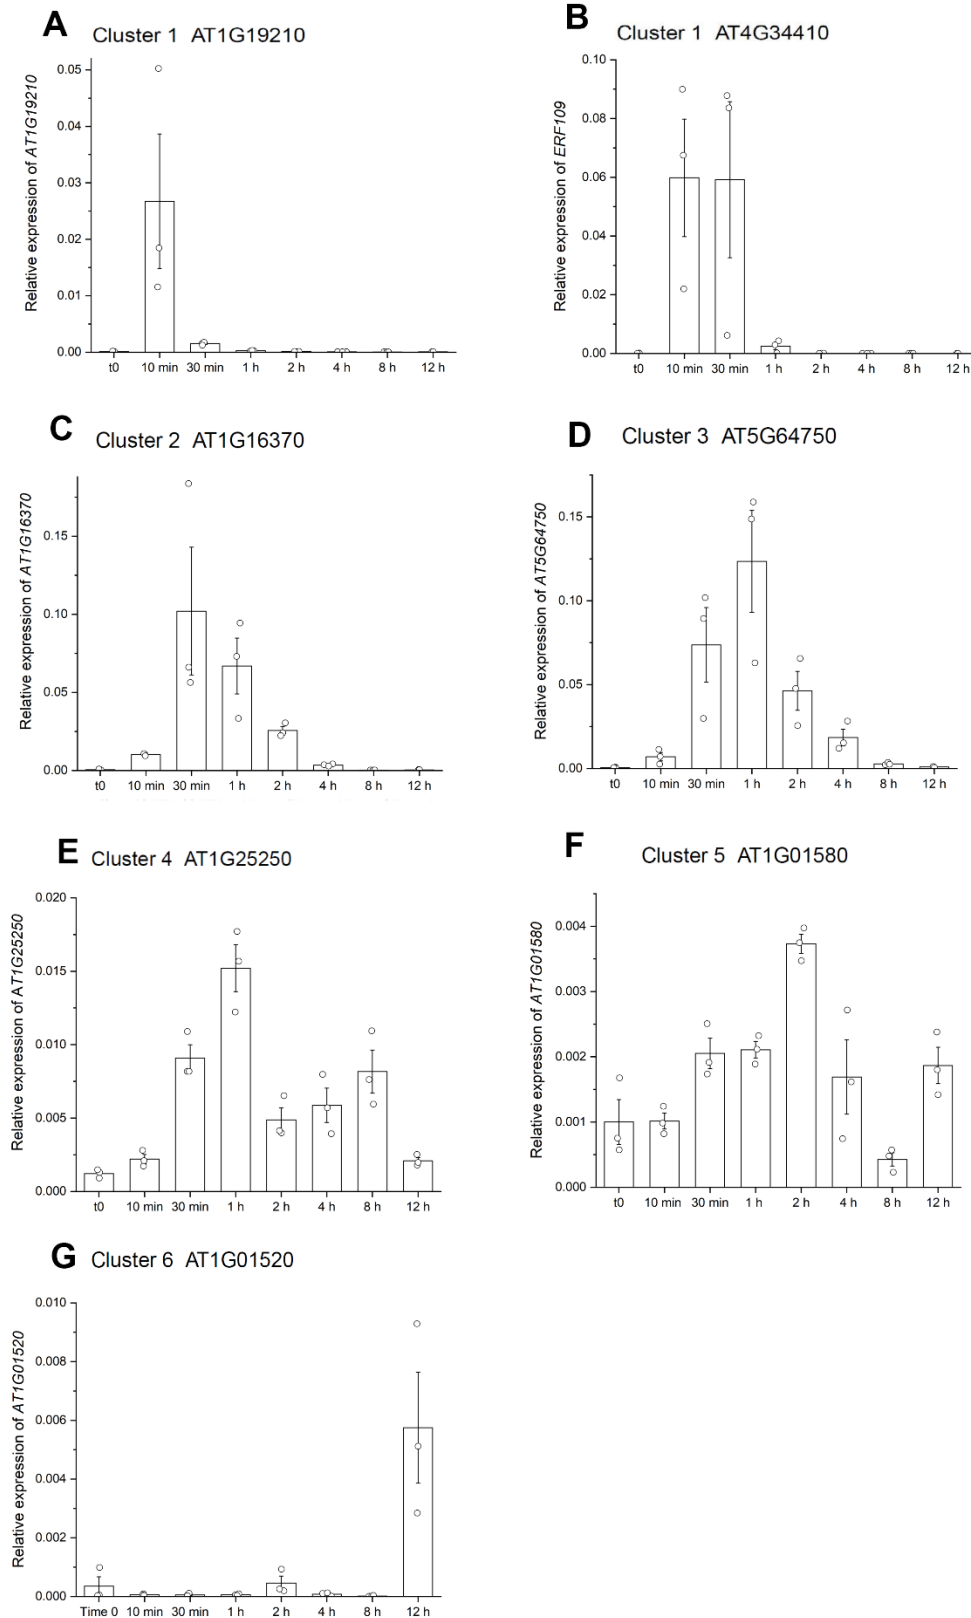

**Supplemental Figure 2. Analysis of gene expression levels in gene-clusters 1 to 6.**

(A–G) Selected genes from the gene-clusters 1 to 6 and qRT-PCR analysis of their expression levels. The whole leaf explants of Col-0 were used for qRT-PCR. Error bars show SEM with three biological replicates.

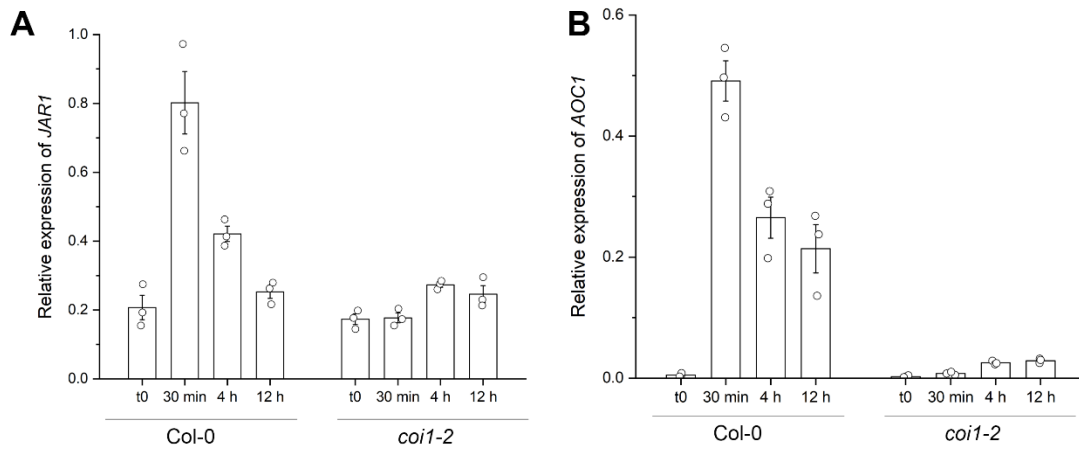

**Supplemental Figure 3. Analysis of gene expression levels in Col-0 and *coi1-2*.**

**(A, B)** qRT-PCR analysis of the expression levels of *JAR1* (A) and *AOC1* (B) in Col-0 and *coi1-2*. The whole leaf explants were used for qRT-PCR. Error bars show SEM with three biological replicates.

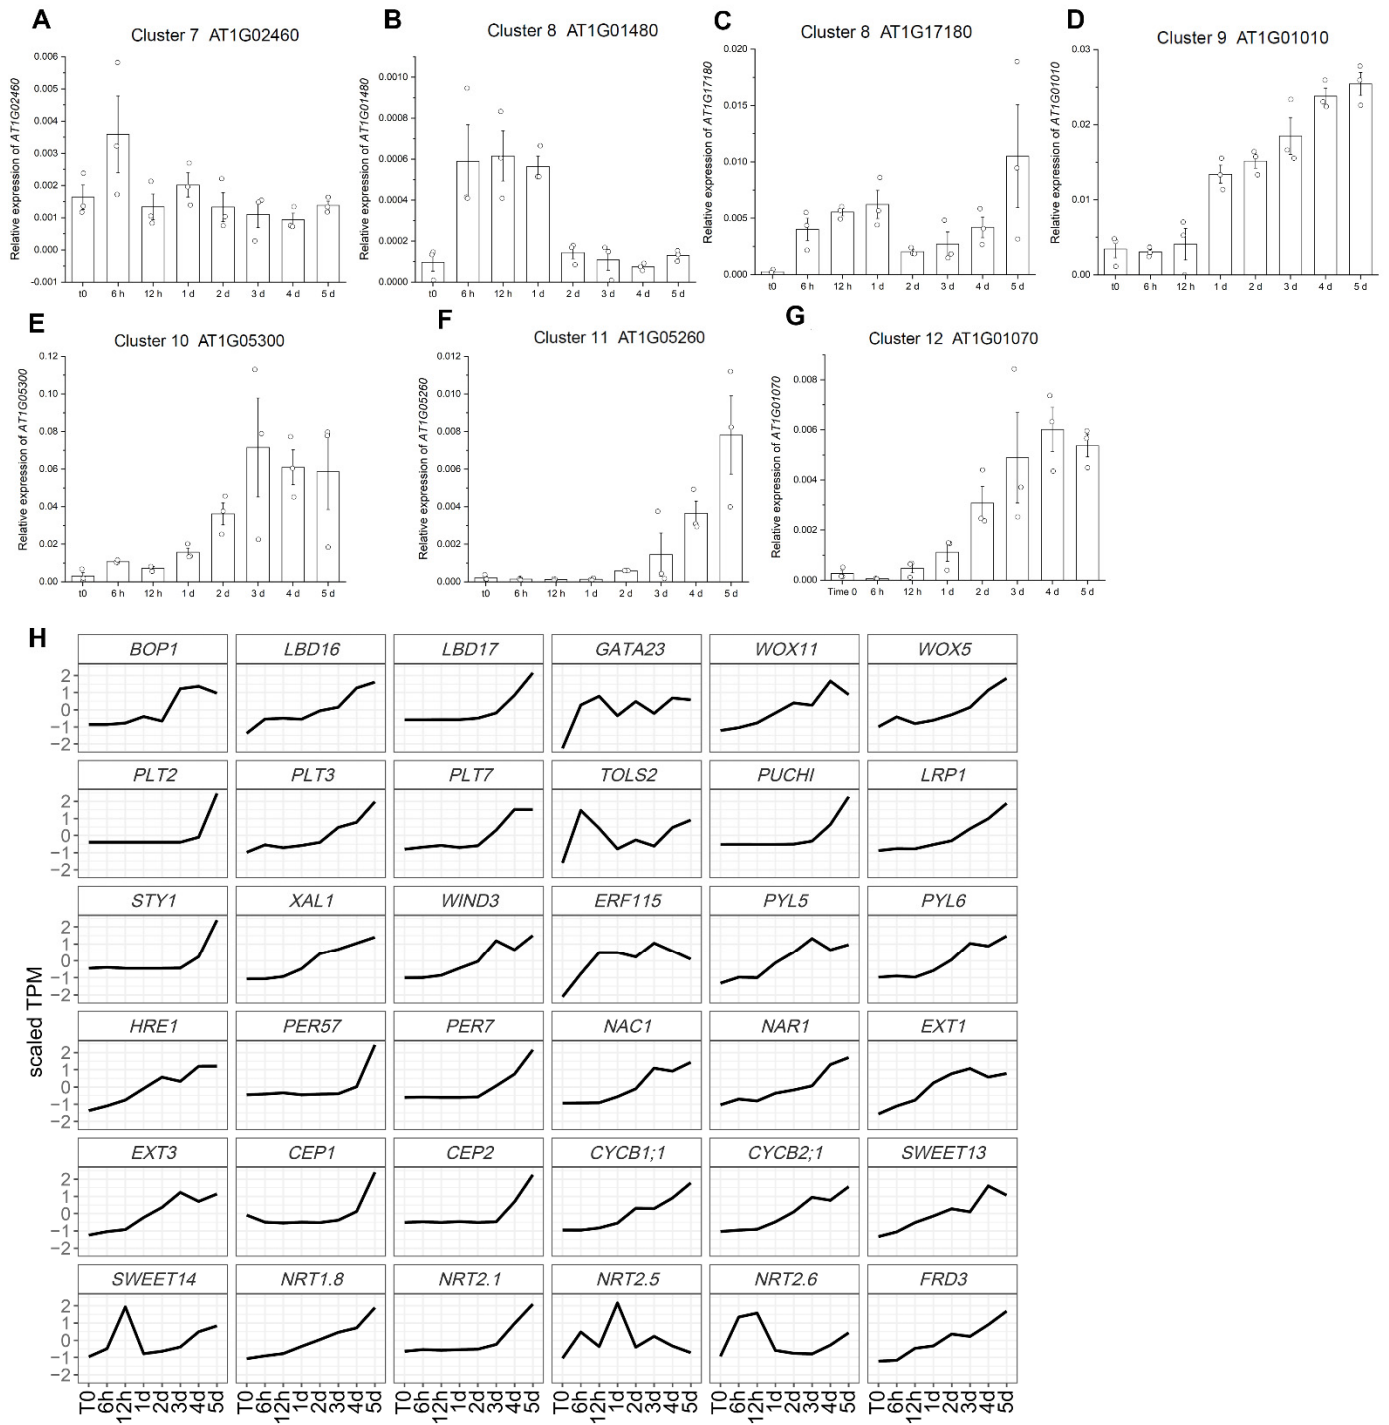

**Supplemental Figure 4. Analysis of gene expression levels in gene-clusters 7 to 12.**

**(A–G)** Selected candidate genes from the gene-clusters 7 to 12 and qRT-PCR analysis of their expression levels. The wounded region of Col-0 leaf explants was used for qRT-PCR. Error bars show SEM with three biological replicates.

**(H)** Expression patterns of selected candidate genes in time-lapse RNA-seq data.



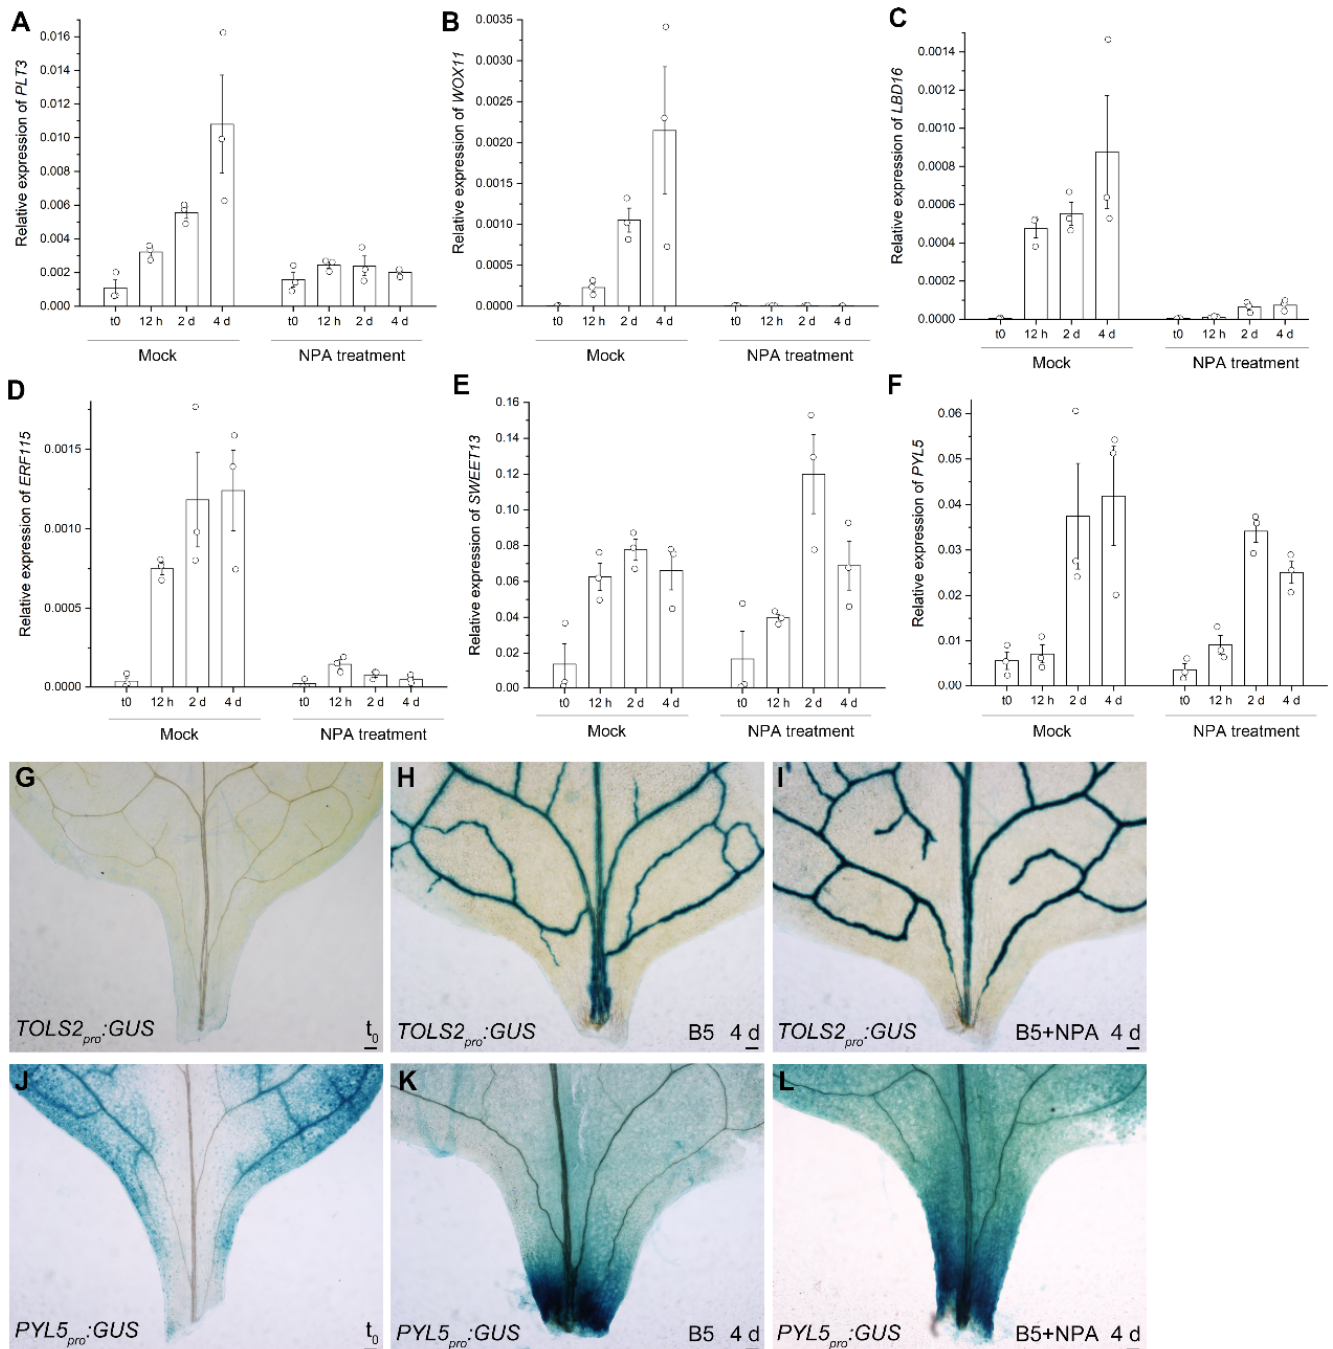

**Supplemental Figure 5. Analysis of gene expression levels by NPA treatment.**

(A–F) qRT-PCR analysis of the expression levels of *PLT3* (A), *WOX11* (B), *LBD16* (C), *ERF115* (D), *SWEET13* (E) and *PYL5* (F) by NPA treatment or in mock control. The wounded region of Col-0 leaf explants was used for qRT-PCR. Error bars show SEM with three biological replicates.

(G–L) GUS staining of *TOLS2<sub>pro</sub>:GUS* (G–I) and *PYL5<sub>pro</sub>:GUS* (J–L) leaf explants at t<sub>0</sub> (G,J) and 4 d (H,I,K,L) cultured on B5 medium (H,K) or B5 medium with 5 μM NPA treatment (I,L).

Scale bars, 100 μm (G–L).

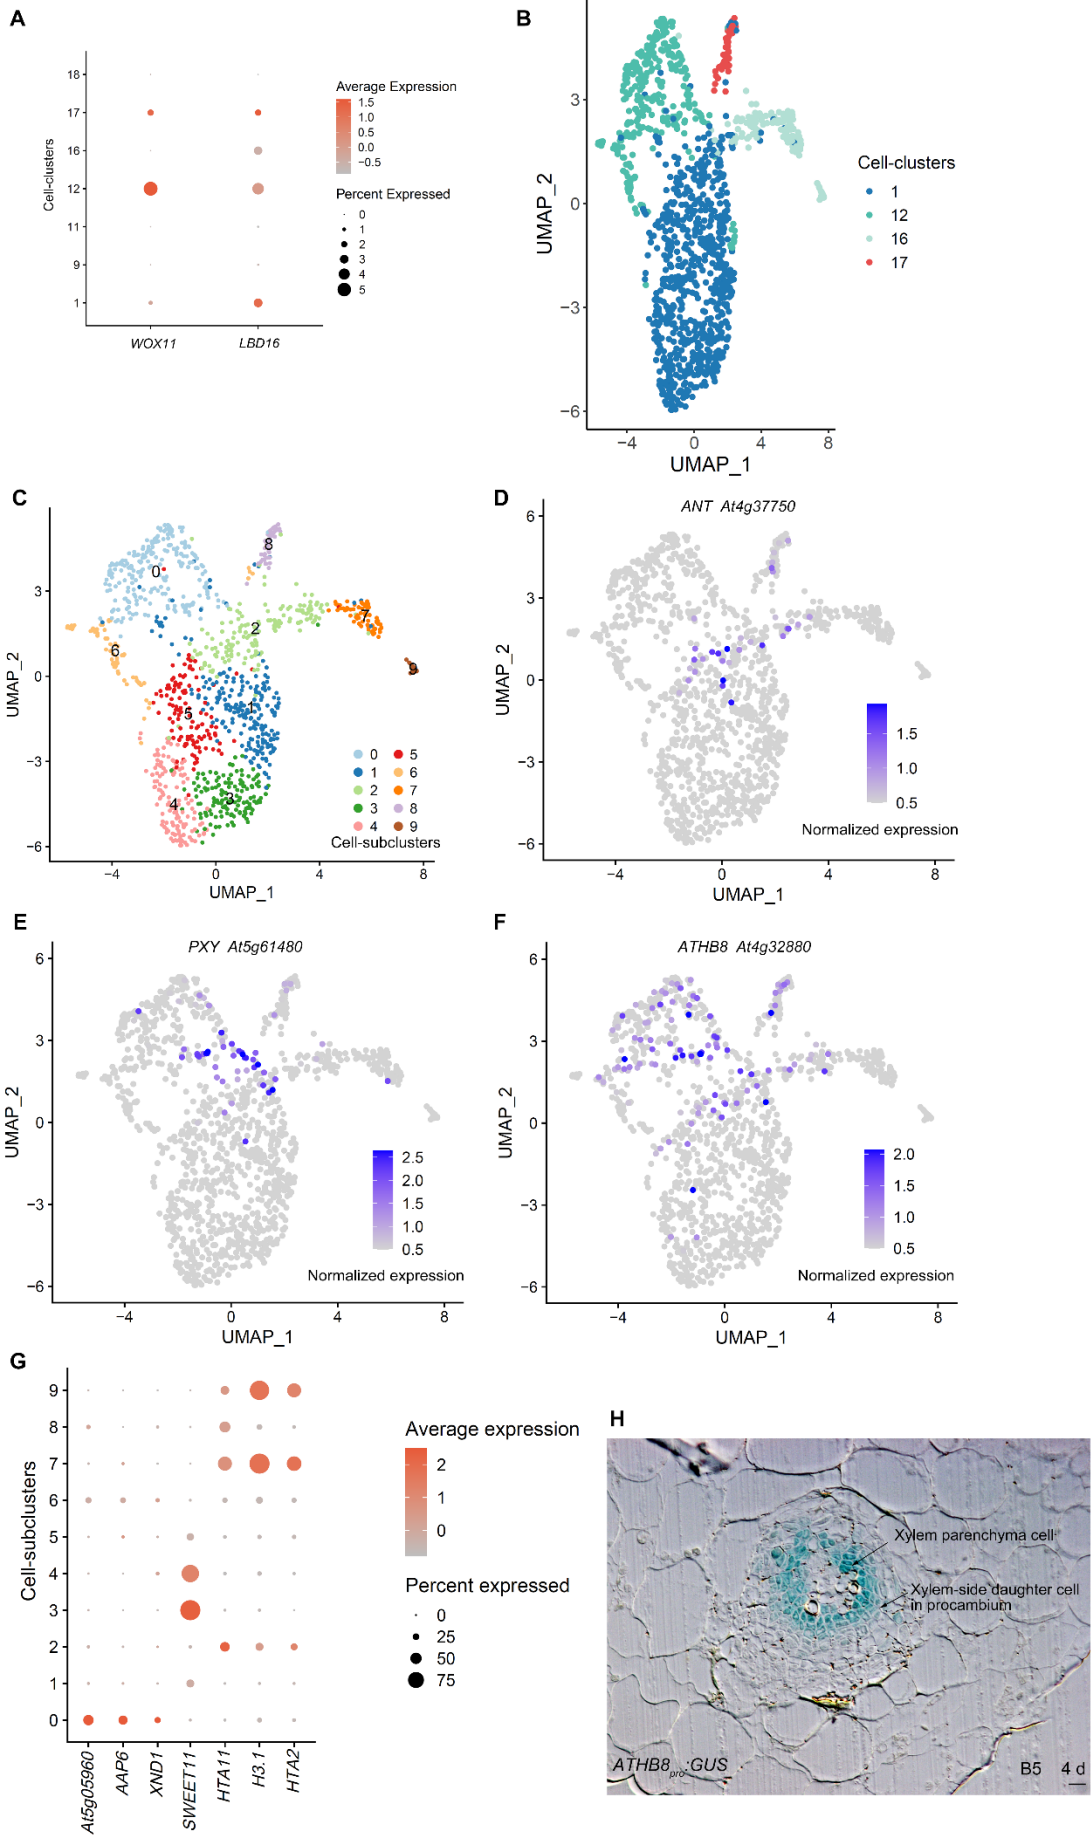



**Supplemental Figure 6. Gene expression patterns in single-cell RNA-seq.**

**(A)** Dot plot of *WOX11* and *LBD16* showing their expression patterns in the vascular (cell-clusters 1, 9, 11, 12, and 18) and dividing cells (cell-clusters 16 and 17). Note that the two marker genes for adventitious root primordium initiation are highly enriched in cell-clusters 1, 12, 16, 17.

**(B)** Original cell-clusters in the new UMAP of cell-subclusters. Cell-clusters 1, 12, 16, and 17 were selected for reconstruction of UMAP analysis. Note that cell-subcluster 8 was mainly from cell-cluster 17, cell-subclusters 0 and 6 were mainly from cell-cluster 12, cell-subclusters 1, 3, 4, and 5 were mainly from cell-cluster 1, cell-subcluster 7 was mainly from cell-cluster 16, and cell-subcluster 2 was mainly from cell-clusters 1, 12, 16.

**(C–F)** UMAP plots showing cell-subclusters 0 to 9 (C), and *ANT* (D), *PXY* (E), and *ATHB8* (F) expression patterns.

**(G)** Dot plot of marker genes showing the cell identities of cell-subclusters.

**(H)** GUS staining of *ATHB8<sub>pro</sub>:GUS* leaf explants at 4 d cultured on B5 medium. Scale bar, 100  $\mu$ m (H).

### **Supplemental Table 1. Overview of time-lapse RNA-seq data.**

Overview of time-lapse RNA-seq data in Col-0 and *coil-2*. Genes with significantly increased or decreased transcript levels at each time point after leaf detachment compared with that at  $t_0$  in Col-0 were listed ( $\log_2[\text{fold change}] > 1$  or  $< -1$  and  $\text{FDR} < 0.05$ ). The gene normalized counts in *coil-2* were listed, showing their regulations by the JA pathway.

GSEA of GO terms in up- or down-regulated genes in Col-0. Full list of GO terms significantly enriched in up- and down-regulated genes at each time point after leaf detachment compared with that at  $t_0$  in Col-0.

List of hub genes in time-lapse RNA-seq data of Col-0 and *coil-2*. Genes with high membership in each module were defined as hub genes of the co-expression network. Transcription factors were marked.

Overview of time-lapse RNA-seq data in mock and NPA treatment. Genes with significantly increased or decreased transcript levels at each time point after leaf detachment compared with that at  $t_0$  in mock were listed ( $\log_2[\text{fold change}] > 1$  or  $< -1$  and  $\text{FDR} < 0.05$ ). The gene normalized counts in NPA treatment were listed, showing their regulations by the auxin pathway.

GSEA of GO terms in up- or down-regulated of genes in mock. Full list of GO terms significantly enriched in up- and down-regulated genes at each time point after leaf detachment compared with that at  $t_0$  in mock.

List of hub genes in time-lapse RNA-seq data of mock and NPA treatment. Genes with high membership in each module were defined as hub genes of the co-expression network. Transcription factors were marked.

### **Supplemental Table 2. Analysis of gene-clusters 1 to 6.**

List of gene-clusters 1 to 6. In Col-0 leaf explants, genes with undetectable or very low transcript levels ( $\text{TPM} < 2$ ) at  $t_0$  but significantly increased transcript levels ( $\log_2[\text{fold change}] > 2$  and  $\text{FDR} < 0.05$ ) at any time point after leaf detachment compared with that at  $t_0$  were grouped into gene-clusters 1 to 6 based on their expression patterns.

Full list of genes and their GO terms in gene-clusters 1 to 6.

### **Supplemental Table 3. Analysis of differentially expressed genes between Col-0 and *coil-2* at 1 h.**

Full list of differentially expressed genes between Col-0 and *coil-2* at 1 h and their GO terms.

Full list of cis element analysis of differentially expressed genes between Col-0 and *coil-2* at 1 h.

### **Supplemental Table 4. Analysis of gene-clusters 7 to 12.**

List of gene-clusters 7 to 12. In the wounded region of the mock control, genes with undetectable or very low transcript levels ( $\text{TPM} < 2$ ) at  $t_0$  but significantly increased

transcript levels ( $\log_2[\text{fold change}] > 2$  and  $\text{FDR} < 0.05$ ) at any time point after leaf detachment compared with that at  $t_0$  were grouped into gene-clusters 7 to 12 based on their expression patterns.

Full list of genes and their GO terms in gene-clusters 7 to 12.

**Supplemental Table 5. Analysis of differentially expressed genes between mock and NPA treatment at 4 and 5 d.**

Full list of differentially expressed genes between mock and NPA treatment at 4 and 5 d and their GO terms.

Full list of cis element analysis of differentially expressed genes between mock and NPA treatment at 4 and 5 d.

**Supplemental Table 6. List of cell-clusters 0 to 18 and cell-subclusters 0 to 9.**

Analysis of specific marker genes in cell-clusters 0 to 18 in single-cell RNA-seq data.

Analysis of specific marker genes in cell-subclusters 0 to 9 in single-cell RNA-seq data.

**Supplemental Table 7. Information of this study.**

Primers used in this study. Note that lower case letters represent additional nucleotides to introduce restriction sites.

Mapping efficiency of RNA-seq.

List of auxin-, JA- and root development-related genes.

List of gene accession numbers.

**Supplemental Data 1. Scripts used in this study.**
